# Supplementary material for: The transcription factor GATA4 promotes myocardial regeneration in neonatal mice
Source: PubMed Central journal article supplement (PMC5286367; doi:10.15252/emmm.201606602), 2017-01-04
Supplement: EMMM-9-265-s001.pdf [file EMMM-9-265-s001.pdf]

## **Appendix PDF**

Appendix Table S1

Appendix Table S2

Appendix Table S3

| Category                            | Gene                  | WT sham        | KO sham       | WT cryo    | KO cryo                  |                          |
|-------------------------------------|-----------------------|----------------|---------------|------------|--------------------------|--------------------------|
| Cell cycle promoting                | Ccna2                 | 1              | 0.65±0.015**  | 0.73±0.056 | 0.37±0.07###             |                          |
|                                     | Ccnb1                 | 1              | 1.11±0.04     | 1.14±0.05  | 1.12±0.2                 |                          |
|                                     | Ccnd1                 | 1              | 0.89±0.07     | 0.77±0.04  | 0.94±0.09                |                          |
|                                     | Ccnd2                 | 1              | 0.78±0.1      | 1.02±0.03  | 1.23±0.09                |                          |
|                                     | Ccnd3                 | 1              | 0.74±0.05     | 0.75±0.09  | 0.65±0.04                |                          |
|                                     | Ccne1                 | 1              | 0.63±0.06**   | 0.54±0.07  | 0.79±0.07                |                          |
|                                     | Cdk4                  | 1              | 0.58±0.06**   | 0.76±0.09  | 0.67±0.012               |                          |
|                                     | E2f1                  | 1              | 0.47±0.01*    | 0.68±0.08  | 0.549±0.02               |                          |
|                                     | Cenpa                 | 1              | 0.655±0.027** | 0.8±0.025  | 0.51±0.0058###           |                          |
|                                     | Zfp191                | 1              | 1.06±0.14     | 1.03±0.06  | 0.38±0.1##               |                          |
|                                     | Cdc2 (cdk1)           | 1              | 0.59±0.07*    | 0.89±0.11  | 0.8±0.06                 |                          |
|                                     | Cell cycle inhibiting | Rbl1 (p107)    | 1             | 0.94±0.11  | 0.86±0.13                | 0.47±0.05 <sup>#</sup>   |
|                                     |                       | Rab3gap1(p130) | 1             | 0.98±0.17  | 1.1±0.06                 | 0.522±0.04 <sup>##</sup> |
| Tsc22d1                             |                       | 1              | 1.84±0.62     | 1.22±0.13  | 2.00±0.31 <sup>#</sup>   |                          |
| Meis1                               |                       | 1              | 1.12±0.19     | 0.9±0.07   | 0.46±0.05 <sup>##</sup>  |                          |
| Regenerative cytokines or receptors | Il13                  | 1              | 1.25±0.22     | 1.1±0.075  | 0.65±0.096 <sup>#</sup>  |                          |
|                                     | Ctf1                  | 1              | 1.23±0.3      | 0.93±0.49  | 0.878±0.15               |                          |
|                                     | Igf1                  | 1              | 0.91±0.046    | N/A        | N/A                      |                          |
|                                     | Igf2r                 | 1              | 1.1±0.189     | 1.12±0.066 | 0.56±0.068 <sup>##</sup> |                          |
|                                     | Vegfa                 | 1              | 1.3±0.28      | 1.1±0.08   | 0.51±0.11 <sup>#</sup>   |                          |
|                                     | Fgf16                 | 1              | 0.5±0.13      | 0.76±0.19  | 0.71±0.44                |                          |
| Anti-regenerative cytokines         | Tgfb                  | 1              | 1.02±0.06     | 0.933±0.19 | 0.87±0.08                |                          |

**Appendix Table S1:** Relative regenerative gene expression (average ± SEM) in the heart of wild-type (WT) or cardiomyocyte specific *Gata4* knock-out (KO) mice (n=3/group) 7 days after cryoinjury (cryo) or sham surgery. \*p<0.05, \*\*p<0.01, \*\*\*p<0.001 vs WT sham; #p<0.05, ##p<0.01, ###p<0.001 vs. WT cryo.

| Category                            | Gene            | Ad.Control | Ad.GATA4      |
|-------------------------------------|-----------------|------------|---------------|
| Cell cycle promoting                | Ccna2           | 1          | 1.2±0.16      |
|                                     | Ccnd1           | 1          | 1.02±0.1      |
|                                     | Ccnd2           | 1          | 1.35±0.26     |
|                                     | Ccnd3           | 1          | 0.94±0.12     |
|                                     | Ccne1           | 1          | 2.24±0.27**   |
|                                     | Cdk4            | 1          | 1.29±0.03***  |
|                                     | E2f1            | 1          | 1.15±0.15     |
|                                     | Cenpa           | 1          | 0.70±0.08*    |
|                                     | Zfp191          | 1          | 1.26±0.15     |
|                                     | Cdc2 (cdk1)     | 1          | 2.03±0.158*** |
| Cell cycle inhibiting               | Rbl1 (p107)     | 1          | 1.68±0.33     |
|                                     | Rab3gap1 (p130) | 1          | 1.68±0.21*    |
|                                     | Tsc22d1         | 1          | 0.60±0.08**   |
| Regenerative cytokines or receptors | Il13            | 1          | 1.41±0.1*     |
|                                     | Ctf1            | 1          | 2.53±0.23***  |
|                                     | Fgf16           | 1          | 0.4±0.03***   |
|                                     | Igf2r           | 1          | 1.47±0.09**   |

**Appendix Table S2:** Relative regenerative gene expression (average ± SEM) in neonatal rat cardiomyocytes treated with adenoviruses (Ad.) as indicated (n=6-9/group). \*p<0.05, \*\*p<0.01, \*\*\*p<0.001 vs. Ad.Control treated cells.

| <b>Mouse Genes</b> | <b>Forward sequence 5' to 3'</b> | <b>Reverse sequence 5' to 3'</b> |
|--------------------|----------------------------------|----------------------------------|
| Nppa               | ATTGACAGGATTGGAGCCCAGAGT         | TGACACACCACAAGGGCTTAGGAT         |
| Nppb               | CTCAAGCTGCTTTGGGCACAAGAT         | AGCCAGGAGGTCTTCCTACAACAA         |
| Gapdh              | ACCCAGAAGACTGTGGATGG             | CACATTGGGGGTAGGAACAC             |
| Ccna2              | CTTGGCTGCACCAACAGTAA             | AGCAATGAGTGAAGGCAGGT             |
| Ccnb1              | TGGACTACGACATGGTGCAT             | CTCCGTGTGGGACAGGTAGT             |
| Ccnd1              | CATTGCCCTTCCATCCTCTA             | ACCAGCCTCTTCCTCCACTT             |
| Ccnd2              | TCGATGATTGCAACTGGAAG             | ATGCTGCTCTTGACGGAACT             |
| Ccnd3              | TAGGCGCCTGCTCTATGTCT             | ATCTGTGGGAGTGCTGGTCT             |
| Ccne1              | CACAACATCCAGACCCACAC             | GGCAGGTTTGGTCATTCTGT             |
| Cdk4               | GTGCCAGAGATGGAGGAGTC             | TTGTGCAGGTAGGAGTGCTG             |
| E2F1               | AGAGTGAGCAGCAGCTGGAT             | CCATCTGTTCTGCAGGGTCT             |
| Cenpa              | AACTGCGCAGAAGACAGAA              | ACCACGGCTGAACTTCTCAC             |
| Zfp91              | CCTGGGAACTCCACTCTCTG             | GCTGGGGAACACCTATGTTG             |
| Cdc2 (cdk1)        | AGCTCTGGGCACTCCTAACA             | TCCATCCAGAGGGCTACATC             |
| Rb1 (P107)         | TCCCACACATTAAGCAGCAG             | CAGGTGAGTCTGCATCTCCA             |
| Rab3gap1 (P130)    | CTGGAGCAGCCTGAGGTATC             | CTGGGCAGCCTGATTTCTTA             |
| Tsc22d1            | GCCTGGATTTCTCCGATTTT             | TCACCGCATAACATCAAATGG            |
| Meis1              | TCACACTGGCCTTAAAGAGGA            | TGCCTACTCCATCCATACCC             |
| Il13               | TGCCAAGATCTGTGTCTCTCC            | CCCACTCCATACCATGCTG              |
| Ctf1               | TCATTCCTACCCATTTGGA              | AGGGCTCTCCCTGTTGCT               |

|                            |                                  |                                  |
|----------------------------|----------------------------------|----------------------------------|
| Igf1                       | CACCCACAAAACAACACCTG             | CACGAACTGAAGAGCATCCA             |
| Igf2r                      | CGCAGGGCCAGAGTATAAAG             | CCATCAGCCATTCTGTCTCA             |
| Vegfa                      | CACGACAGAAGGAGAGCAGA             | ACACAGGACGGCTTGAAGAT             |
| Tgfb1                      | CACCATCCATGACATGAACC             | TACTGTGTGTCCAGGCTCCA             |
| Myh6                       | ACTGTGGTGCCTCGTTCC               | GCCTCTAGGCGTTCCTTCTC             |
| Myh7                       | AGCATTCTCCTGCTGTTTCC             | CTCCAGCCTCTCCTTCTCAG             |
| Kit                        | AAAGGCCAACATTCAAGCAG             | GAGTTGACCCTCACGGAATG             |
| Cd14                       | GCCTTTCTCGGAGCCTATCT             | TGGCTTCGGATCTGAGAAGT             |
| Vim                        | AGATCGATGTGGACGTTTCC             | TCCGGTACTCGTTTGACTCC             |
| Wt1                        | TGACTTCAAGGACTGCGAGA             | CGCTGACAAGTTTTACTGGA             |
| Fgf16                      | GCTTCCACCTTGAGATCTTCC            | TCTCCTCGCTCATTCAATTCC            |
| IL-13 promoter<br>Primer 1 | ACCCAGAACCTGGAAACCCT             | GTGGCCGCTAAAGGAAAGAGT            |
| IL-13 promoter<br>Primer 2 | CGTGCAGCTGAGGAACAATA             | TTCTCCCTTCCTTCCTTTC              |
| <b>Rat Genes</b>           | <b>Forward sequence 5' to 3'</b> | <b>Reverse sequence 5' to 3'</b> |
| Gapdh                      | ACCACCATGGAGAAGGCTGG             | CTCAGTGTAGCCCAGGATGC             |
| Ccna2                      | CTTGGCTGCACCAACAGTAA             | AAGGCAGCTCCAGCAATAAG             |
| Ccnd1                      | CACAACGCACTTTCTTTCCA             | CAAGCCAGACCAGCTTCTTC             |
| Ccnd2                      | CTTCAGCAGGACGAGGAAGT             | GTGCTGCTCTTGACGGAAGT             |
| Ccnd3                      | CTTTGCGATGTACCCTCCAT             | ATCTGTGGGAGTGCTGGTCT             |
| Ccne1                      | GATGGGAAGTTCCAAGCTCA             | GGCAGGTCTGGTCATTCTGT             |
| Cdk4                       | GATTGCCTCCAGAAGACGAC             | GGTCACTTTCCTCCTTGTGC             |

|                 |                        |                      |
|-----------------|------------------------|----------------------|
| E2F1            | CTGCAACAACCTGCAGGAGAG  | CCATTTGTTCTGCAGGGTCT |
| Cenpa           | ACACTGCGCAGAAGACAGAA   | ACCACGGCTGAACTTCTCAC |
| Zfp191          | AGCTTGACGCCGTAGAGAAC   | CTGAAGCGATCTCCTGCTTT |
| Cdc2 (cdk1)     | CCCCTAACAAACGAAGTGTGG  | AGGGCCATTTTTCCAGAGAT |
| Rbl1 (P107)     | GATGGGAAGTTCCAAGCTCA   | GGCAGGTCTGGTCATTCTGT |
| Rab3gap1 (P130) | GCTGTCACTGAAGCGGAAAT   | CCTGATACTGGGCCTGAGTC |
| Tsc22d1         | CCTGGGCAATGACTTTGTTT   | AGGGTCAACAGGTTGCATTT |
| Ctf1            | TCATTCCTACCCCATTTGGA   | AGGGCTCTCCCTGTTGCT   |
| Igf2r           | ACCAATTGCTGCAGAAGGAG   | GCACCTGGATCTCTTCCATC |
| Il13            | AGATCCACATCTCCCCCTGT   | ATACCATGCTGCTGTTGCAC |
| Fgf16           | GGGCTTCCACCTTGAAATCT   | GATCCAAACAGCTCTCCTC  |
| Raldh2          | GAGAGTGACCCTGGAACCTCG  | GGCCCTTTCCACACTTCTTT |
| Tcf21           | AATTGCTGCTACCTTCATCTTT | AGCTCACGGTTCCCAGACT  |
| CD206           | ATGCCAAGTGGGAAAATCTG   | TGTAGCAGTGGCCTGCATAG |
| CD86            | CAGTTACTGTGGCCCTCCTC   | CAGCGTTACTATCCCGCTCT |

**Appendix Table S3:** Sequences of primers used in quantitative real-time PCR.
