# Supplementary material for: The transcription factor GATA4 promotes myocardial regeneration in neonatal mice
Source: PubMed Central journal article supplement (PMC5286367; doi:10.15252/emmm.201606602), 2017-01-04
Supplement: EMMM-9-265-s002.pdf [file EMMM-9-265-s002.pdf]

## Expanded View Figures

### Figure EV1. GATA4 is necessary for cardiac regeneration after cryoinjury.

- A Cardiac GATA4 protein abundance analyzed by immunoblotting in mice treated as indicated. + denotes positive control for GATA4 from cardiomyocytes infected with a GATA4-overexpressing adenovirus.
- B Densitometric quantification of the immunoblot shown in (A); \*\*\* $P = 0.0008$  for sham vs. cryoinfarction and \*\*\* $P < 0.0001$  for 2 days (d) after sham surgery vs. 7 days after sham surgery.
- C Quantification of left ventricular (LV) scar area of the indicated mice 7 days after cryoinjury (performed at P0).
- D Cardiac GATA4 protein abundance analyzed by immunoblotting in mice treated as indicated.
- E Quantification of the immunoblot shown in (D); \*\* $P = 0.0062$ .
- F Quantification of left ventricular (LV) scar area of the indicated mice treated with adenoviruses (Ad.) as shown 7 days after cryoinjury; \*\* $P = 0.003$  between Con and CM-G4-KO mice treated with control adenovirus (Ad.Con) and \*\* $P = 0.0043$  between CM-G4-KO mice treated with Ad.Con or GATA4-overexpressing adenovirus (Ad.GATA4).
- G Echocardiographic analysis of left ventricular systolic function in the indicated mice 2 months (M) after sham surgery or cryoinjury.

Data information: (B, C, E–G) The number within bars indicates the number of mice analyzed in that particular group. All data are expressed as mean  $\pm$  SEM. Unpaired Student's  $t$ -test (C) and one-way ANOVA with Sidak's multiple comparisons test (B, E–G) were used to compare groups.

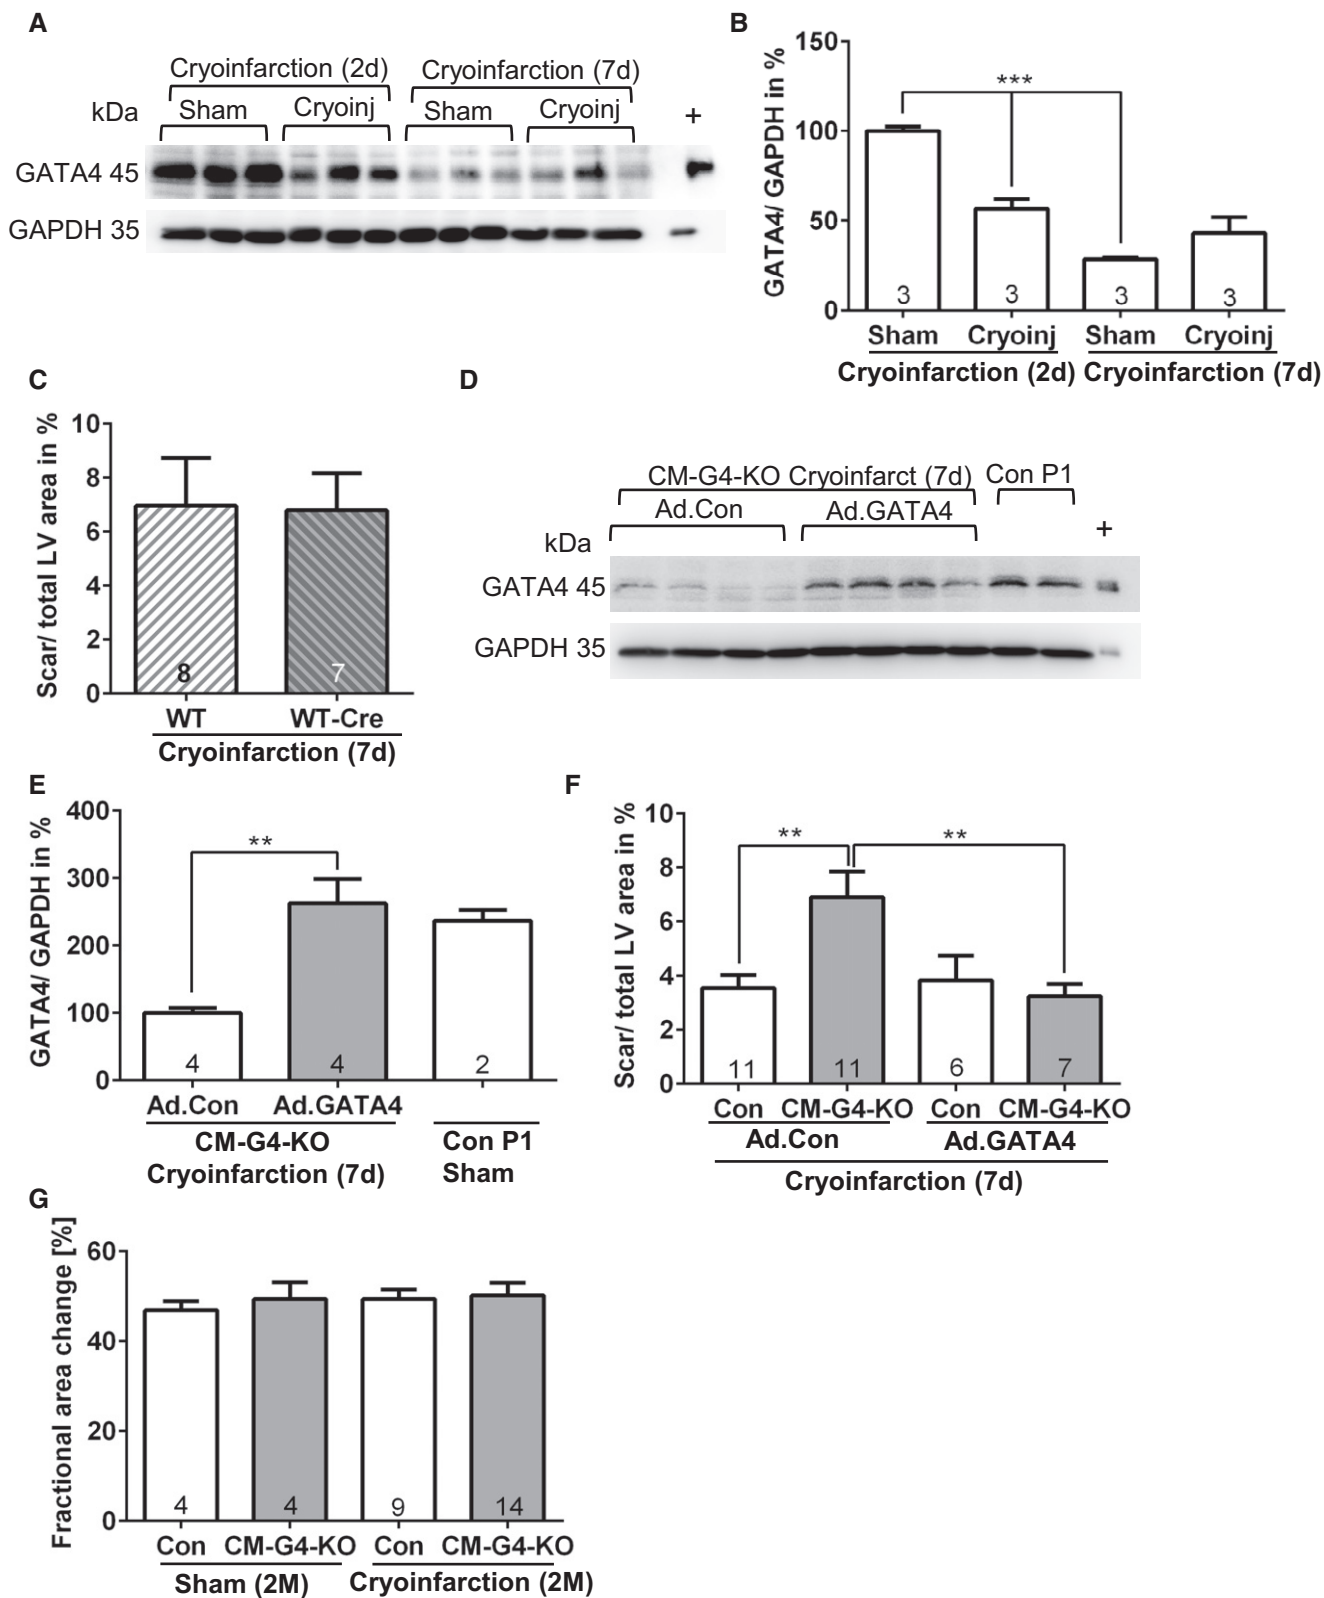

Figure EV1.

**Figure EV2. Reduced angiogenesis and reduced cardiomyocyte proliferation in CM-G4-KO mice.**

- A Cardiac *Cd31* mRNA expression measured by qPCR in the indicated mice; \*\*\*\* $P < 0.0001$ .
- B Quantification of pH3-positive cardiomyocytes (CM) in mice 1 day (d) after sham or cryoinfarction as indicated; \* $P = 0.011$ .
- C Quantification of cardiomyocyte cell division in mice 1 day (d) after sham or cryoinfarction as indicated; \*\* $P = 0.0069$ .
- D Quantification of myocardial macrophage abundance (positive for F4/80) in the indicated mice 7 days after sham surgery or cryoinfarction. \*\*\* $P = 0.0003$ .
- E Heart weight/body weight (BW) ratio in the indicated mice 3 h after cryoinfarction.
- F Heart weight/body weight ratio in the indicated mice 7 days after sham surgery or cryoinfarction.
- G Representative wheat germ agglutinin (WGA)-stained myocardial sections for the quantification of cardiomyocyte (CM) cross-sectional area assessed 7 days after cryoinfarction in the indicated mice. Scale bars: 20  $\mu\text{m}$ . The lower two pictures contain encircled cardiomyocyte cross sections (by a fine white line) of which the area was determined to obtain the cross-sectional area.
- H qPCR-based determination of myocardial *Nppa* (known as ANP) and *Nppb* (BNP) mRNA expression as hypertrophic marker genes in mice as indicated.

Data information: The number within bars indicates the number of mice analyzed in that particular group. All data are expressed as mean  $\pm$  SEM. Unpaired Student's *t*-test (E, G) and one-way ANOVA with Sidak's multiple comparisons test (A–D, F, H) were used to compare groups.

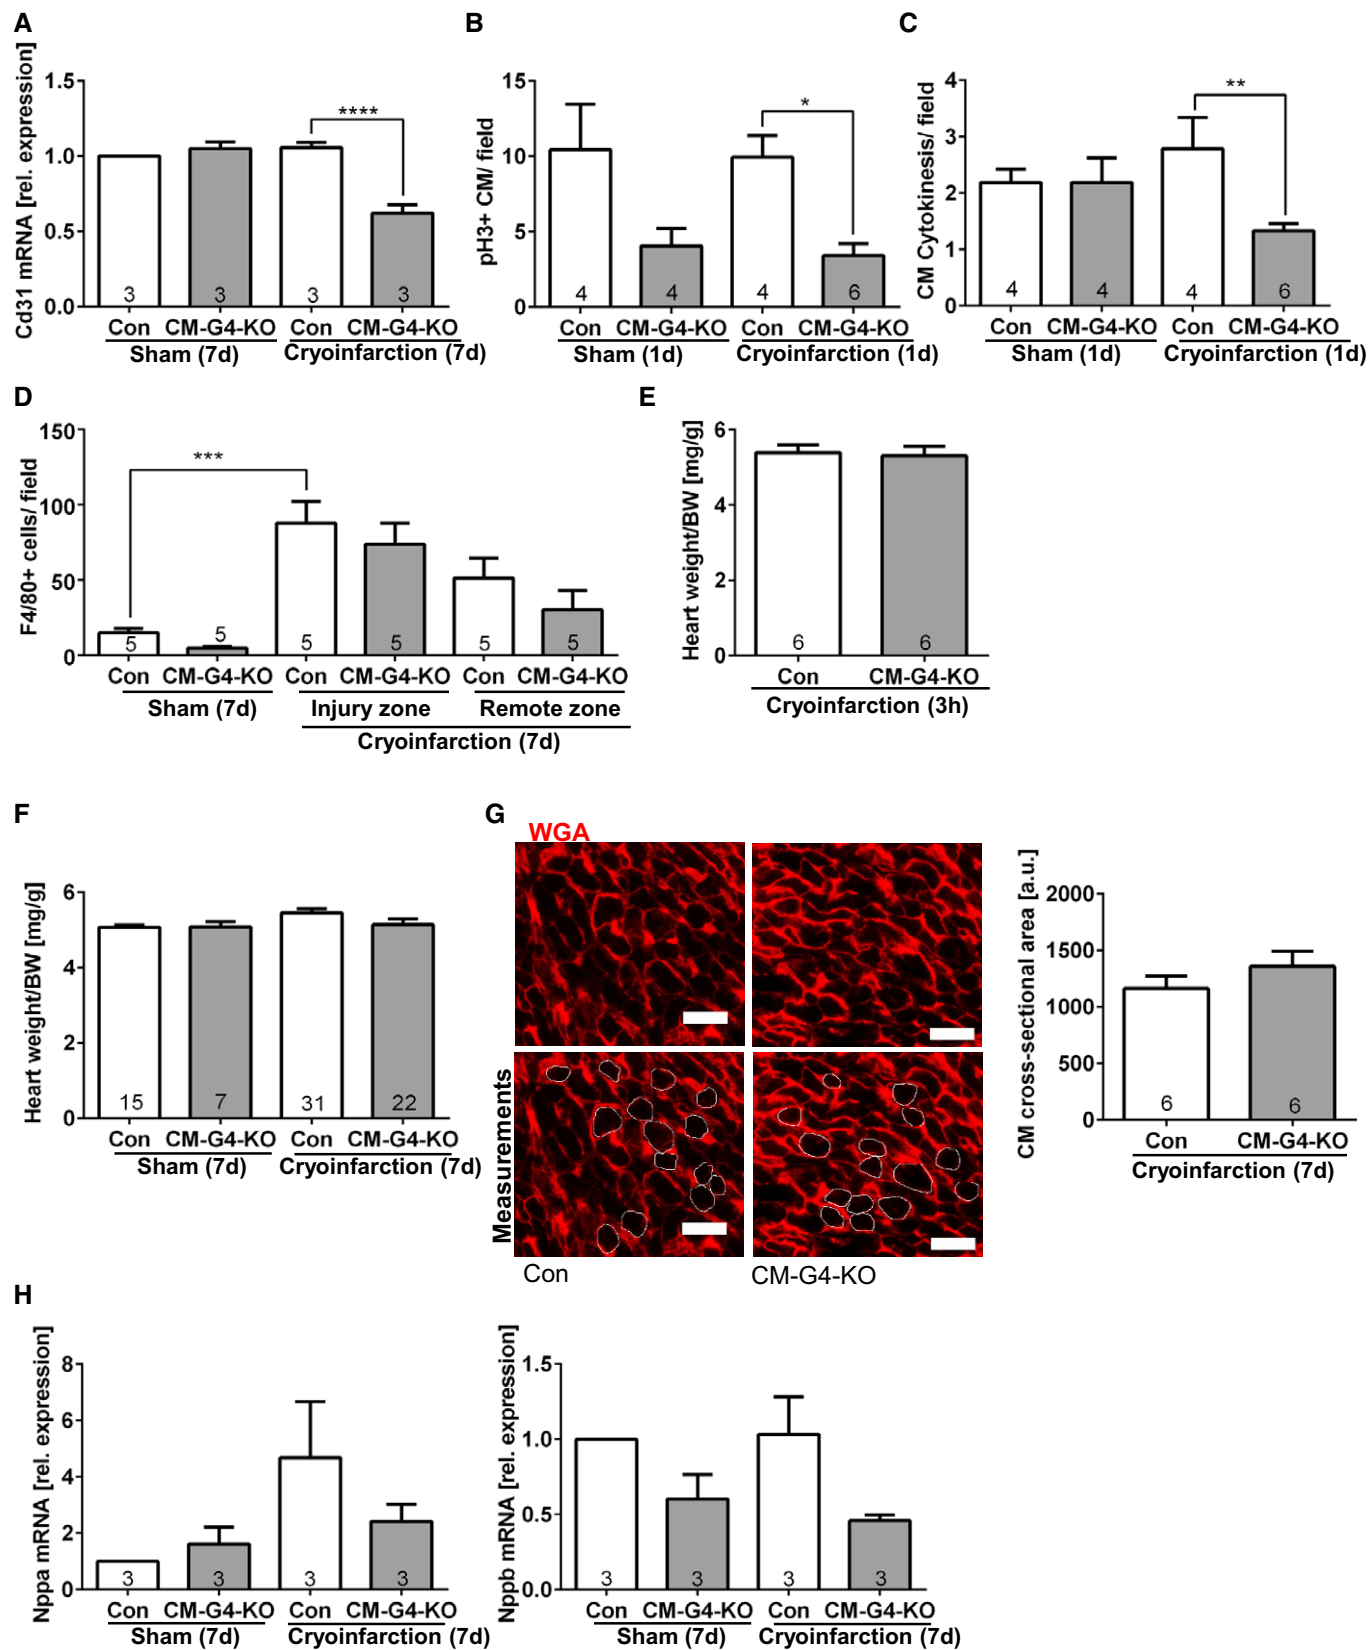

Figure EV2.

**Figure EV3. Cell type-specific gene expression in CM-G4-KO mice.**

- A Expression of the indicated genes assessed by qPCR in the mice as shown; \*\*\*\* $P < 0.0001$ . Data are expressed as mean  $\pm$  SEM. One-way ANOVA with Sidak's multiple comparisons test was used to compare groups. Data are expressed as mean  $\pm$  SEM. One-way ANOVA with Sidak's multiple comparisons test was used to compare groups. The number within bars indicates the number of mice analyzed in that particular group.
- B *In situ* hybridization to detect *Raldh2*, *Tcf21*, or *Tbx18* in the myocardium of the indicated mice 7 days after sham surgery or cryoinfarction to assess epicardial activation. Staining in the embryonic mouse heart served as positive (POS) control. Scale bar: 200  $\mu$ m. A higher magnification of the epicardial region is shown on the right. Scale bar: 20  $\mu$ m.
- C c-kit immunofluorescence staining of a positive control (embryo liver lobes at embryonic day (E) 12) and 7-day-old heart tissues of the indicated mice after injury. Scale bars: 20  $\mu$ m.
- D Wt-1 immunofluorescence staining of 7-day-old Con and CM-G4-KO mice after cryoinjury. Scale bars: 200  $\mu$ m.
- E Myocardial immunofluorescence staining for CD3 as a marker of T cells of the indicated mice 7 days after cryoinjury. An embryonic heart section (from E12) was used as positive control. Scale bars: 20  $\mu$ m.

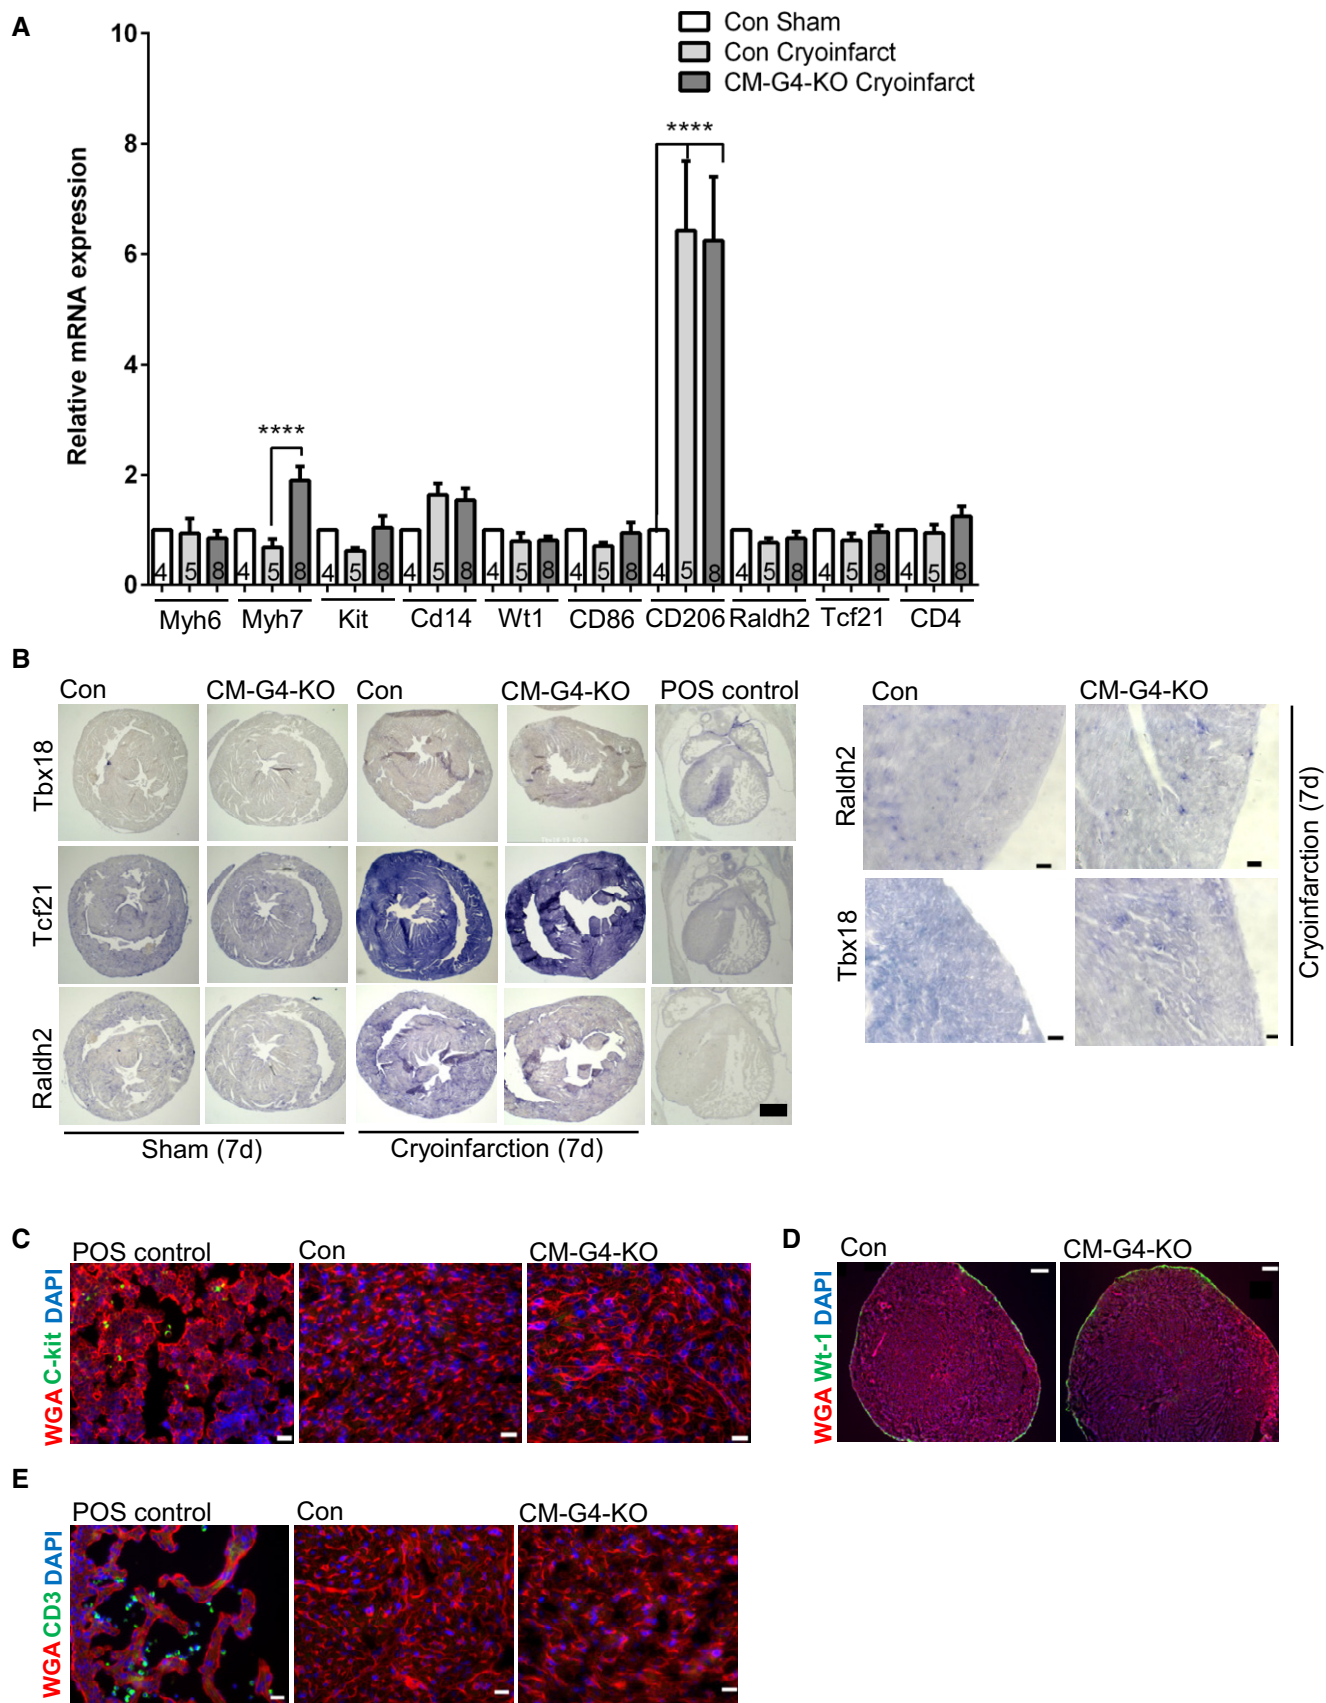

Figure EV3.

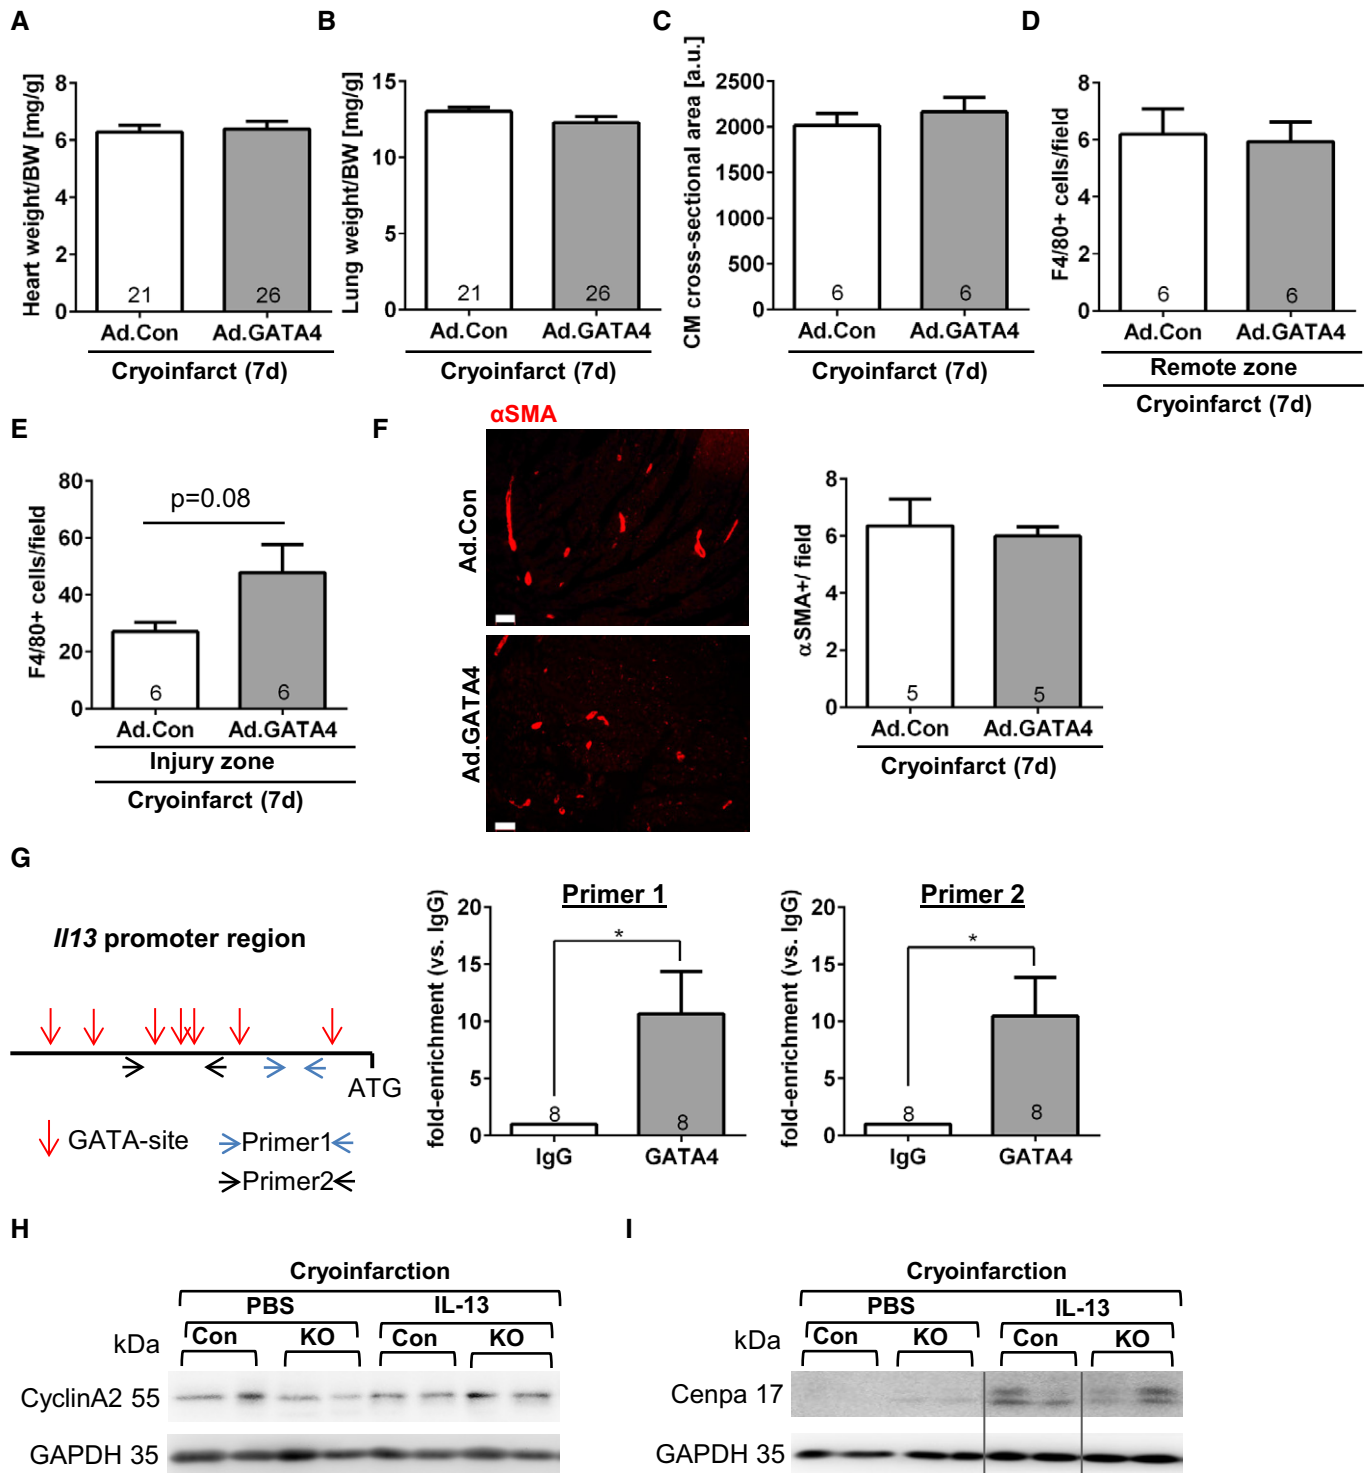

Figure EV4.

**Figure EV4. Additional characterization of GATA4 overexpression and IL-13 in neonatal hearts.**

- A Heart weight/body weight (BW) ratio of the indicated mice 7 days after sham surgery or cryoinfarction and application of adenoviruses as shown.
- B Lung weight/body weight ratio of the indicated mice 7 days after sham surgery or cryoinfarction and application of adenoviruses as shown.
- C Cardiomyocyte (CM) cross-sectional area assessed 7 days after cryoinfarction in the indicated mice.
- D Quantification of myocardial macrophage abundance (positive for F4/80) remote of the infarcted area of the indicated mice.
- E Quantification of myocardial macrophage abundance (positive for F4/80) within the infarcted area of the indicated mice.
- F Myocardial immunofluorescence staining for  $\alpha$ SMA in mice 7 days after cryoinjury and treatment with the indicated viruses. Quantification of small  $\alpha$ SMA-positive small conductance vessel ( $\sim$ 20–50  $\mu$ m in diameter) in the myocardium of mice as shown. Scale bars: 50 $\mu$ m.
- G Scheme of the mouse *Il13* promoter region ( $\sim$ 700 bp) before the ATG translational start sites, GATA binding regions are marked by a red arrow, and the primers used are indicated by blue or black arrows. On the left, the results of a chromatin immunoprecipitation assay from neonatal hearts 7 days after cryoinjury and after immunoprecipitation with control IgG or GATA4 are shown. \* $P$  = 0.0197 for primer 1 and \* $P$  = 0.0142 for primer 2.
- H Representative immunoblots for cyclin A2 and GAPDH from hearts of the mice as indicated (con = control, KO = CM-G4-KO).
- I Representative immunoblots for cenpa and GAPDH from hearts of the mice as indicated. All lanes were run on the same gel but were non-contiguous where indicated by the gray lines.

Data information: (A–G) The number within bars indicates the number of mice analyzed in that particular group. All data are expressed as mean  $\pm$  SEM. Unpaired Student's  $t$ -test was used to compare groups.
