# Supplementary material for: The transcription factor GATA4 promotes myocardial regeneration in neonatal mice
Source: PubMed Central journal article supplement (PMC5286367; doi:10.15252/emmm.201606602), 2017-01-04

Figure 1C and Figure 3A

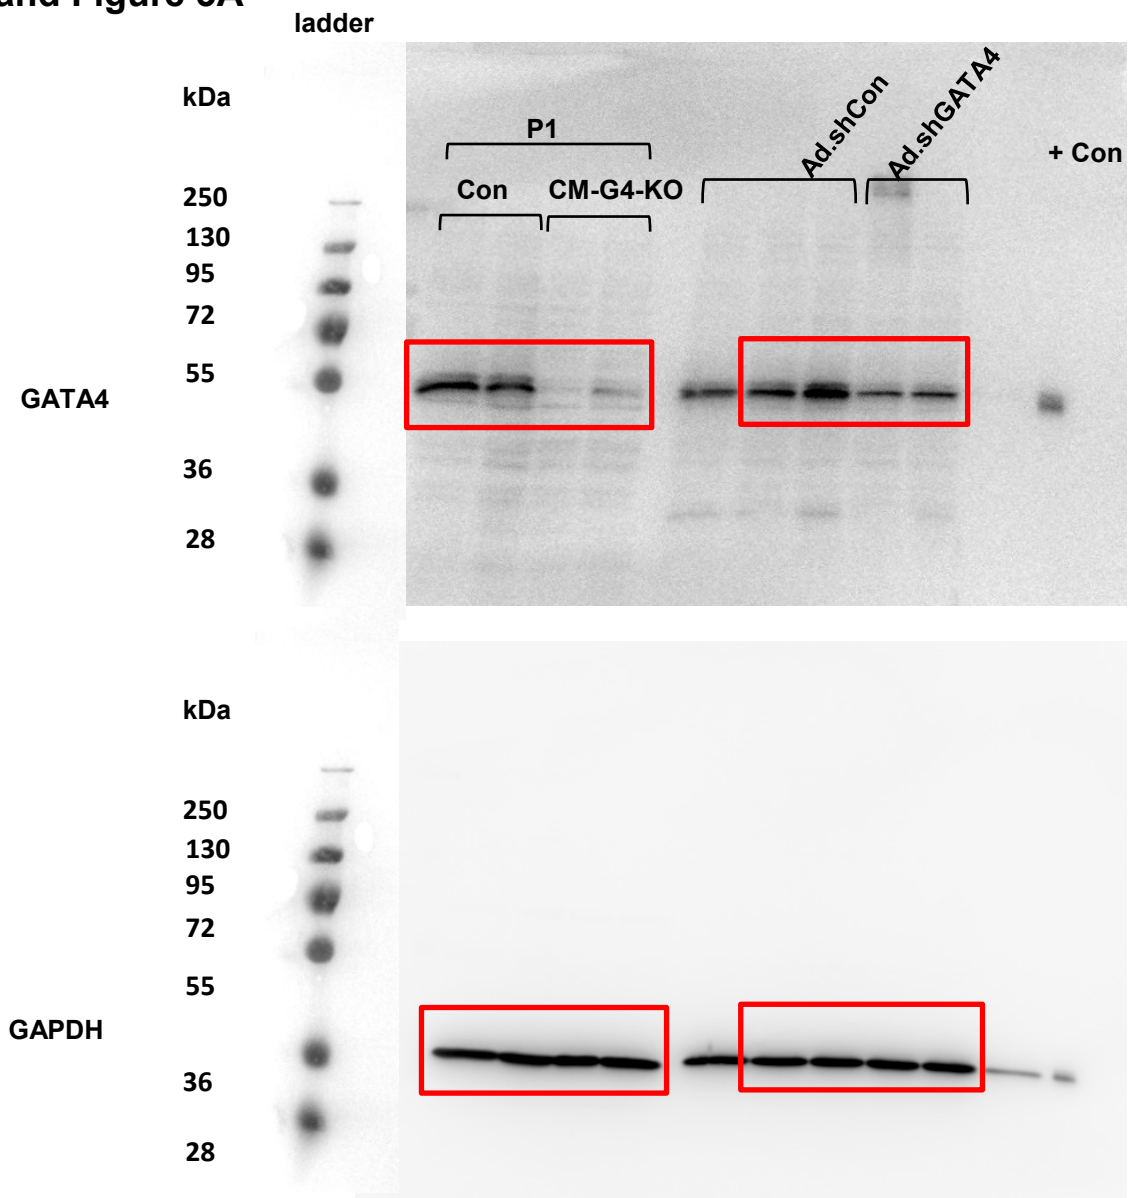

Supplement: EMMM-9-265-s004.pdf [file EMMM-9-265-s004.pdf]
